# Supplementary material for: Whole genome sequencing, molecular typing and in vivo virulence of OXA-48-producing Escherichia coli isolates including ST131 H30-Rx, H22 and H41 subclones
Source: PubMed Central journal article supplement (PMC5608912; doi:10.1038/s41598-017-12015-0), 2017-09-21
Supplement: 41598_2017_12015_MOESM1_ESM.pdf [file 41598_2017_12015_MOESM1_ESM.pdf]

## *Supplementary Information for*

### **Whole genome sequencing, molecular typing and *in vivo* virulence of OXA-48-producing *Escherichia coli* isolates including ST131 H30-Rx, H22 and H41 subclones**

María de Toro<sup>1,#</sup>, Javier Fernández<sup>2,3#</sup>, Vanesa García<sup>2,4</sup>, Azucena Mora<sup>4</sup>, Jorge Blanco<sup>4</sup>,  
Fernando de la Cruz<sup>5</sup> and M. Rosario Rodicio<sup>2,\*</sup>

<sup>1</sup> *Plataforma de Genómica y Bioinformática, Centro de Investigación Biomédica de La Rioja (CIBIR), Logroño, Spain;* <sup>2</sup> *Departamento de Biología Funcional, Área de Microbiología, Universidad de Oviedo (UO), Oviedo, Spain;* <sup>3</sup> *Servicio de Microbiología, Hospital Universitario Central de Asturias (HUCA), Oviedo, Spain;* <sup>4</sup> *Laboratorio de Referencia de Escherichia coli (LREC), Departamento de Microbiología e Parasitología, Facultad de Veterinaria, Universidad de Santiago de Compostela (USC), Lugo, Spain,* <sup>5</sup> *Departamento de Biología Molecular and Instituto de Biomedicina y Biotecnología de Cantabria (IBBTEC), Universidad de Cantabria-CSIC, Santander, Spain*

<sup>#</sup>Both authors have equally contributed to this work.

**Corresponding author.** M. Rosario Rodicio. Departamento de Biología Funcional, Área de Microbiología, Universidad de Oviedo, 33006 Oviedo, Spain. E-mail: rrodicio@uniovi.es

## Supplementary Figures

**Supplementary Figure S1. Pulsed-field gel electrophoresis of *Xba*I-digested DNA from the seven OXA-48 *Escherichia coli* isolates.** The dendrogram was obtained with the UPGMA algorithm based on the Dice similarity coefficient and applying 1% of tolerance in the band position. On the right of the dendrogram, isolate designation, O:H serotype, virotype, ST, PCR typing of *bla* genes and filogroup. The virotype of the ST131 isolates was established based on the presence or absence of 13 VF according to the scheme described by Dahbi *et al.*<sup>1</sup> with 12 defined virotypes. Of the five ST131 isolates of the study, *Ec*-HUCA 4 showed virotype D5 (positive for VF *papG III*, *cnf1*, *hlyA*, *iron*, *kpsM II-K5* and *ibeA*) and *Ec*-HUCA 5 to 7 showed virotype E (positive for VF *papG II*, *cnf1*, *sat*, *hlyA*, and *kpsM II-K5*). Virulence profile of the O16:H5-ST131 isolate did not match any virotype of the scheme, so it was showed as NT (not typeable); NA (not applicable) for those non-ST131 isolates.

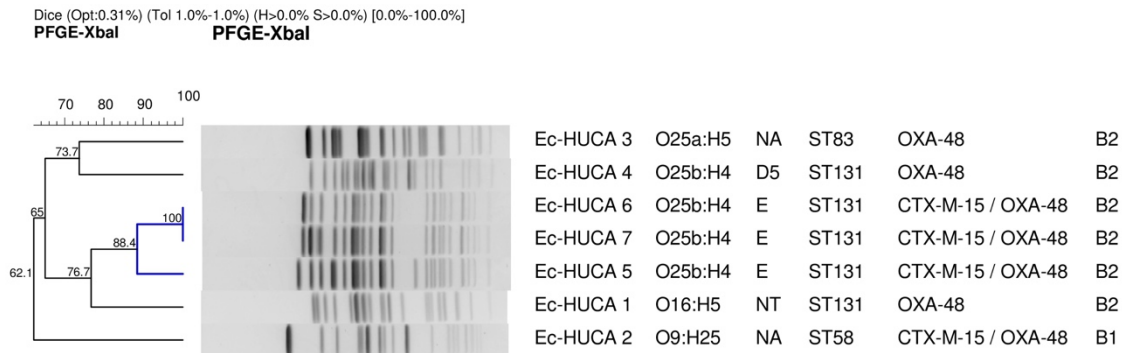

**Supplementary Figure S2.** PLACNET plasmid reconstructions for the seven *Ec*-HUCA genomes (*a* - *g*). Networks contain nodes of two different colors (blue for contigs, grey for reference genomes). The size of reference nodes is always the same. The size of the contig nodes is proportional to the contig length. Besides, outlines are yellow for contigs containing RIP proteins, red for relaxases and green for both proteins. Edges are either solid (scaffold links) or dotted (homologous references). The black line surrounding plasmids composed by only one contig indicates that there are closed plasmids.

Figure S2 (a)

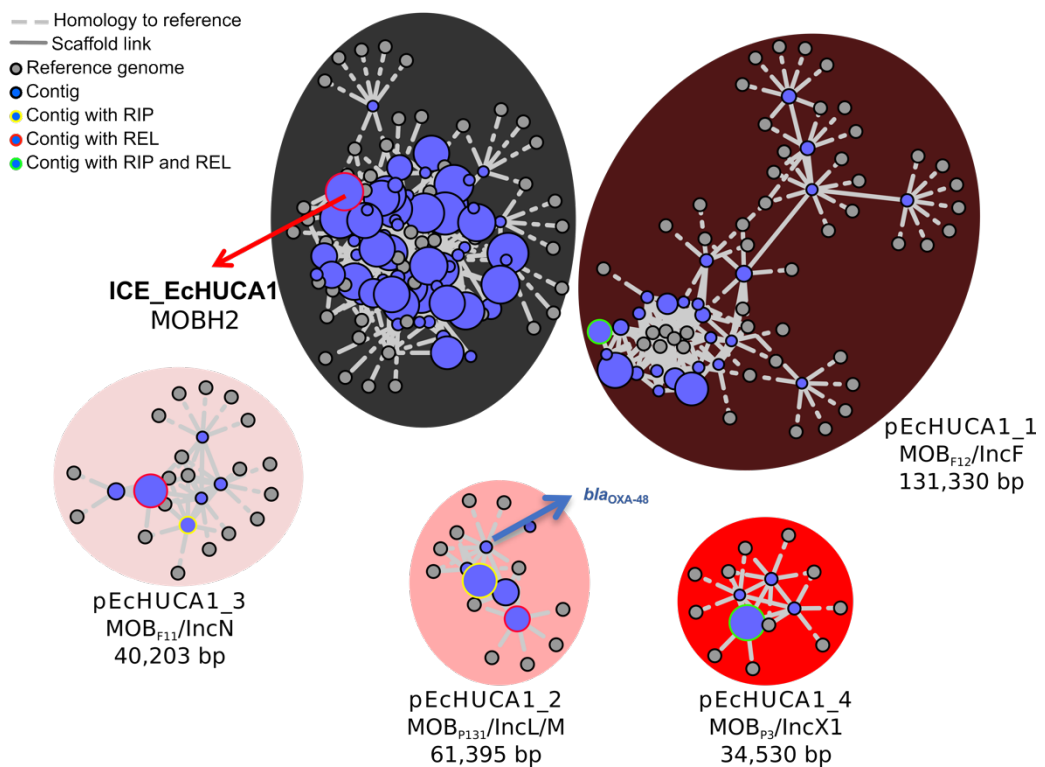

Figure S2 (b)

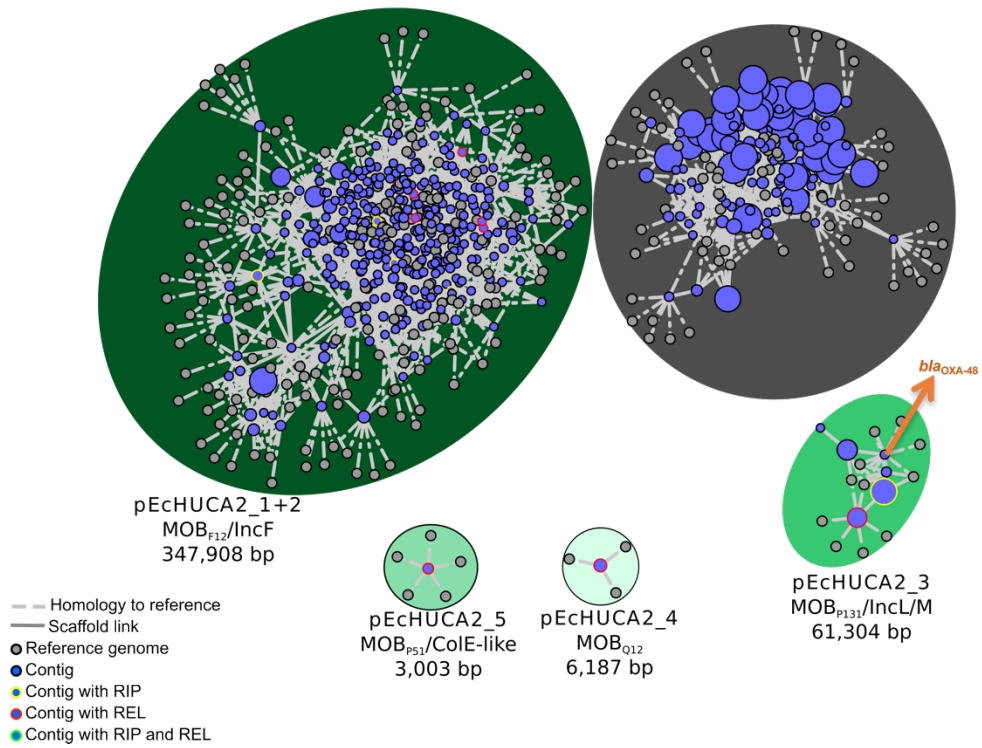

Figure S2 (c)

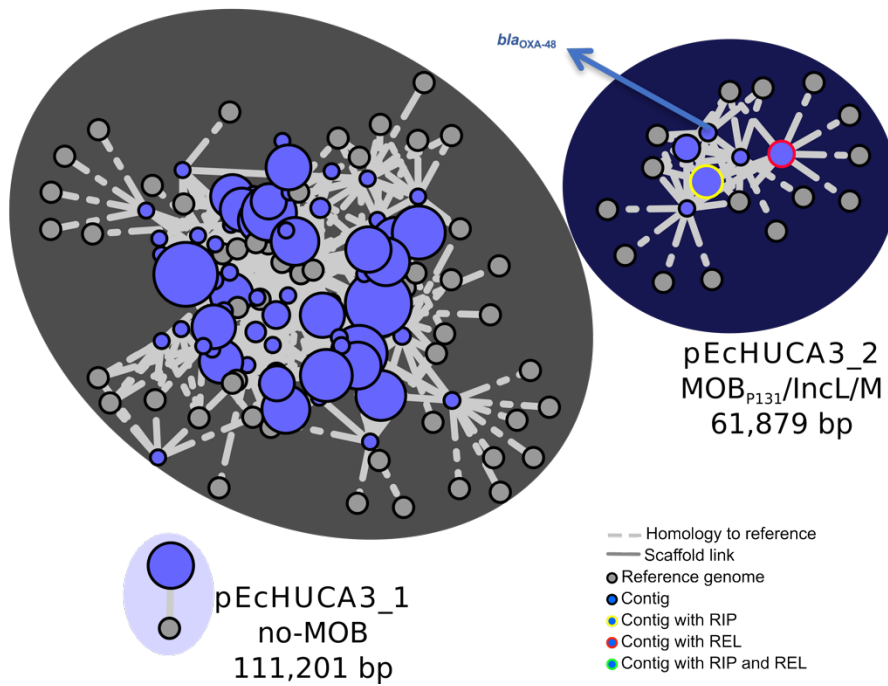

Figure S2 (d)

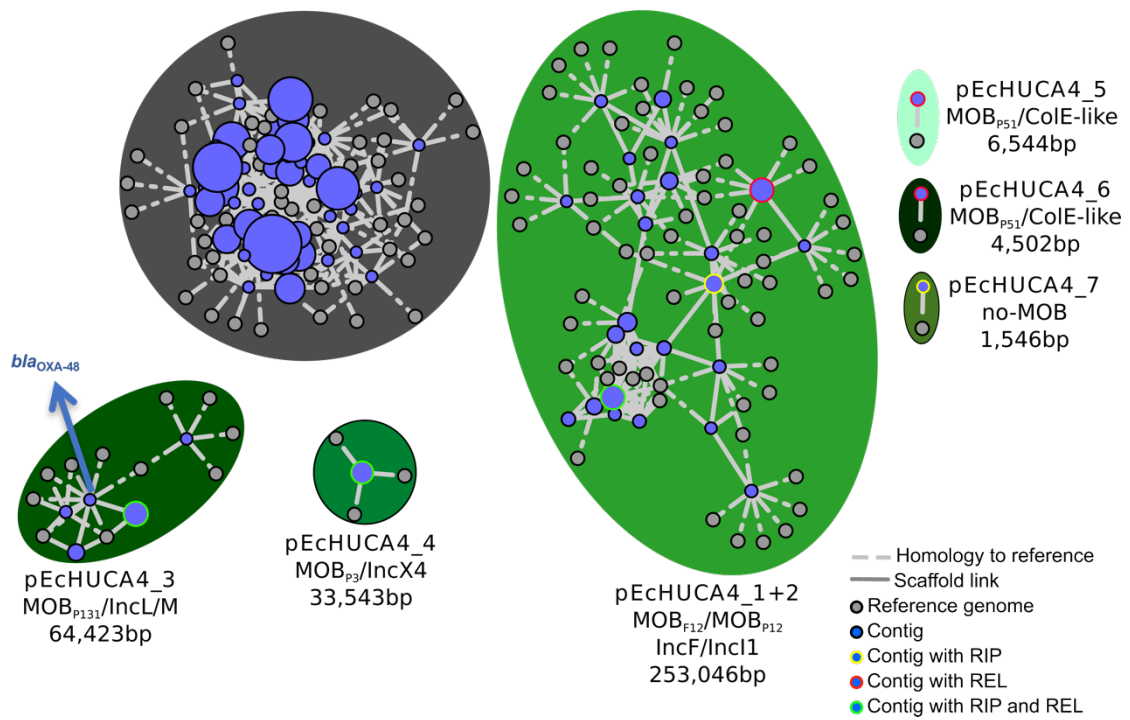

Figure S2 (e)

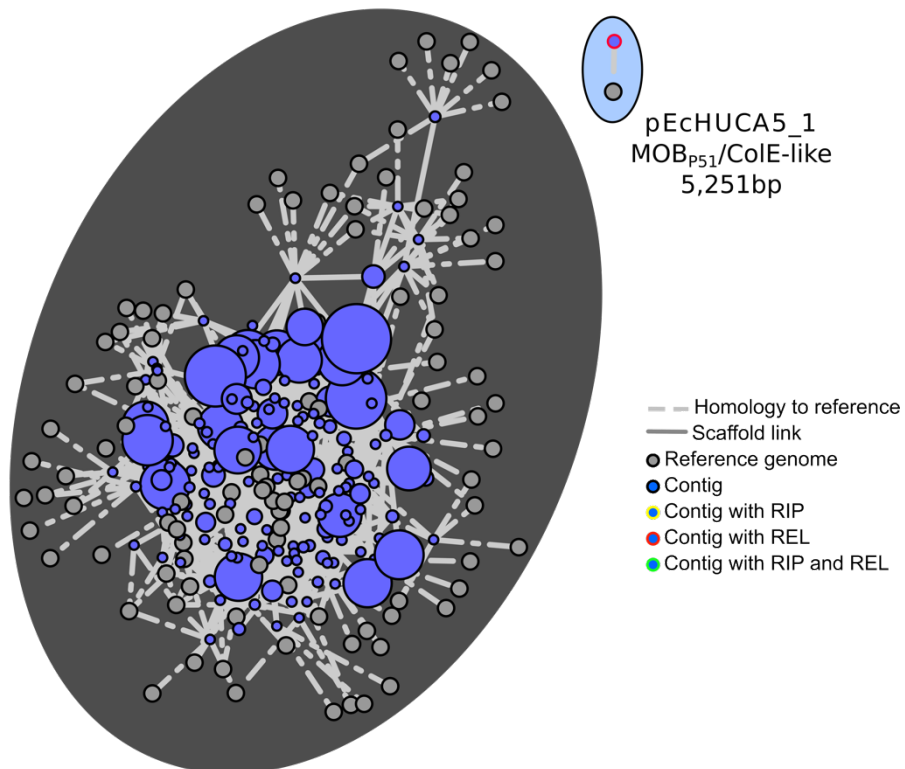

Figure S2 (f)

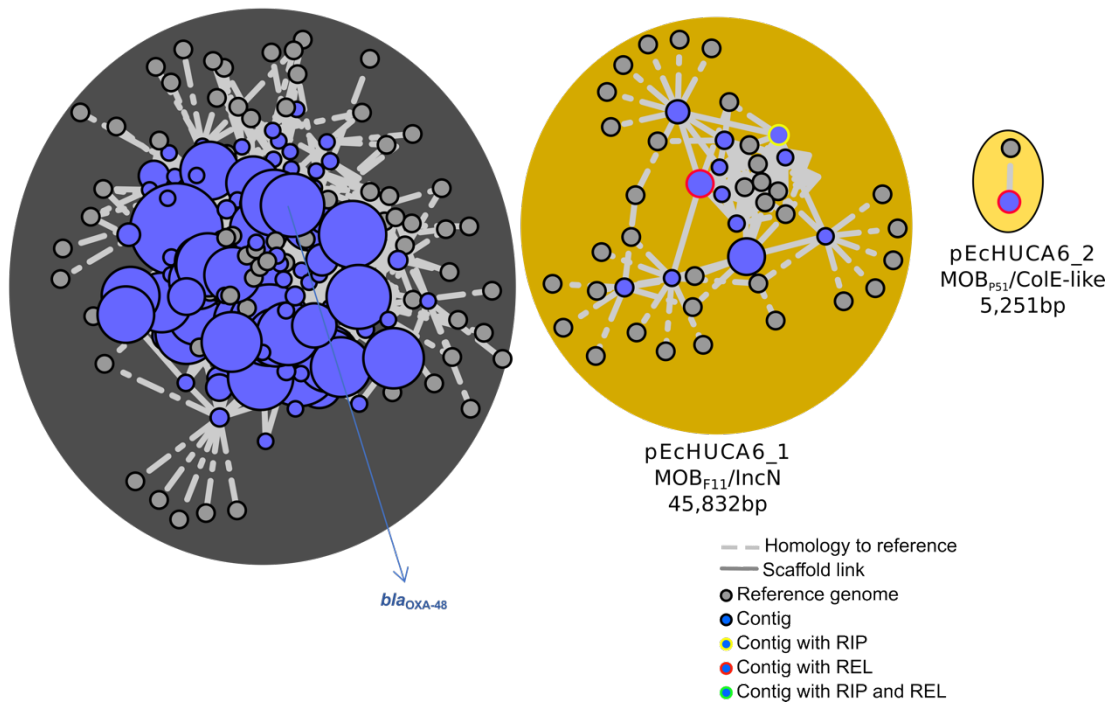

Figure S2 (g)

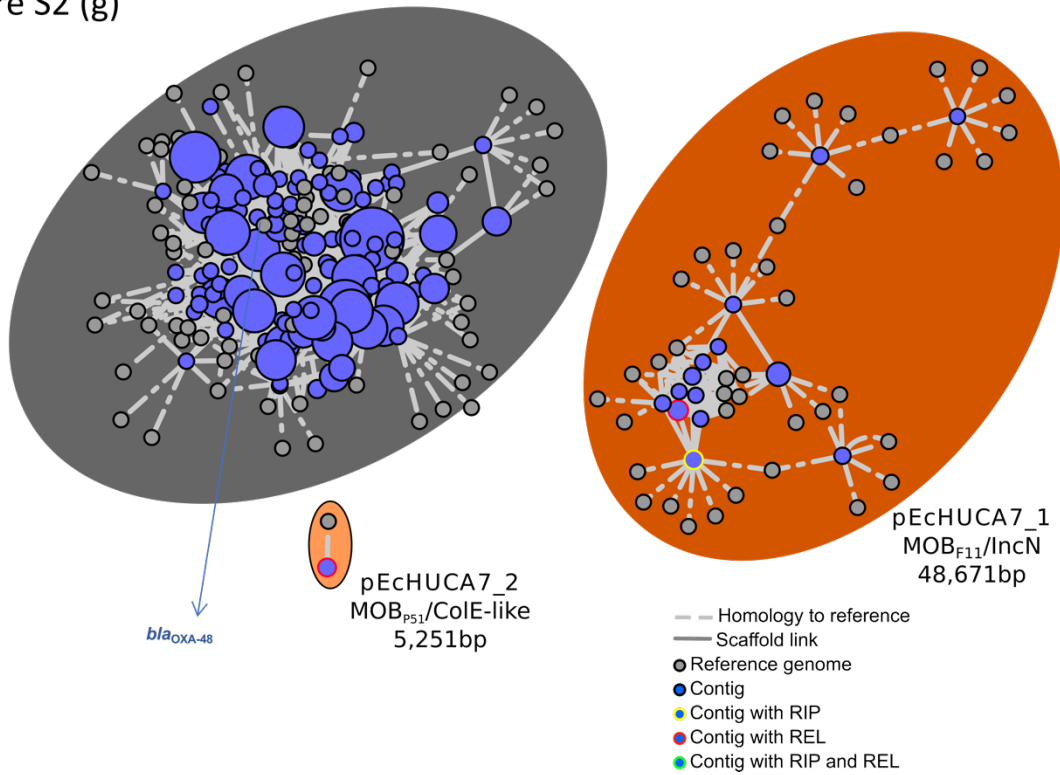

**Supplementary Figure S3.** Plasmid profiles of clinical isolates of *Escherichia coli* as determined by the Kado and Liu method<sup>1</sup>. Lane 1, *Ec*-HUCA 1; lane 2, *Ec*-HUCA 2; lane 3, *Ec*-HUCA 3; lane 4, *Ec*-HUCA 4; lane 5, *Ec*-HUCA 5; lane 6, *Ec*-HUC -6; lane 7, *Ec*-HUCA 7. Lanes i and ii, plasmids obtained from *E. coli* 39R861 (NCTC 50192) and plasmid RP4 used as molecular size standards for uncut DNA. Plasmids hybridizing with *bla*<sub>OXA-48</sub> probes are marked with asterisks.

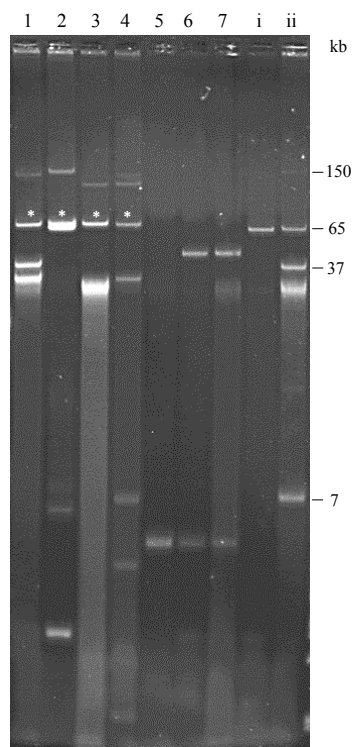

**Supplementary Figure S4.** Strategy used to determine the genetic environment of the *bla*<sub>OXA-48</sub> gene in clinical isolates of *Escherichia coli* by PCR mapping. The schematic representations of *Tn1999.2* (A), inverted *Tn1999.2* (B), inverted  $\Delta$ *Tn1999.2* (C and D) and *E. coli* chromosomal genes are based on GenBank accession numbers JN714122, LN864821.1 and HG977710.1, respectively. The amplicons expected in the performed reactions, and their sizes in kb, are represented by horizontal bars below the schemes, with obtained and not obtained amplicons represented by continuous and discontinuous lines, respectively. Open reading frames are represented by arrows indicating the direction of transcription and having different fillings: orange, *IS1999*; black dots, *IS1*; red, *bla*<sub>OXA-48</sub>; purple, *lysR*; blue, IncL plasmid genes; green, *E. coli* chromosomal genes. The *Tn1999*-like structures are highlighted by yellow boxes.



# A. Tn1999.2 *Ec*-HUCA 4

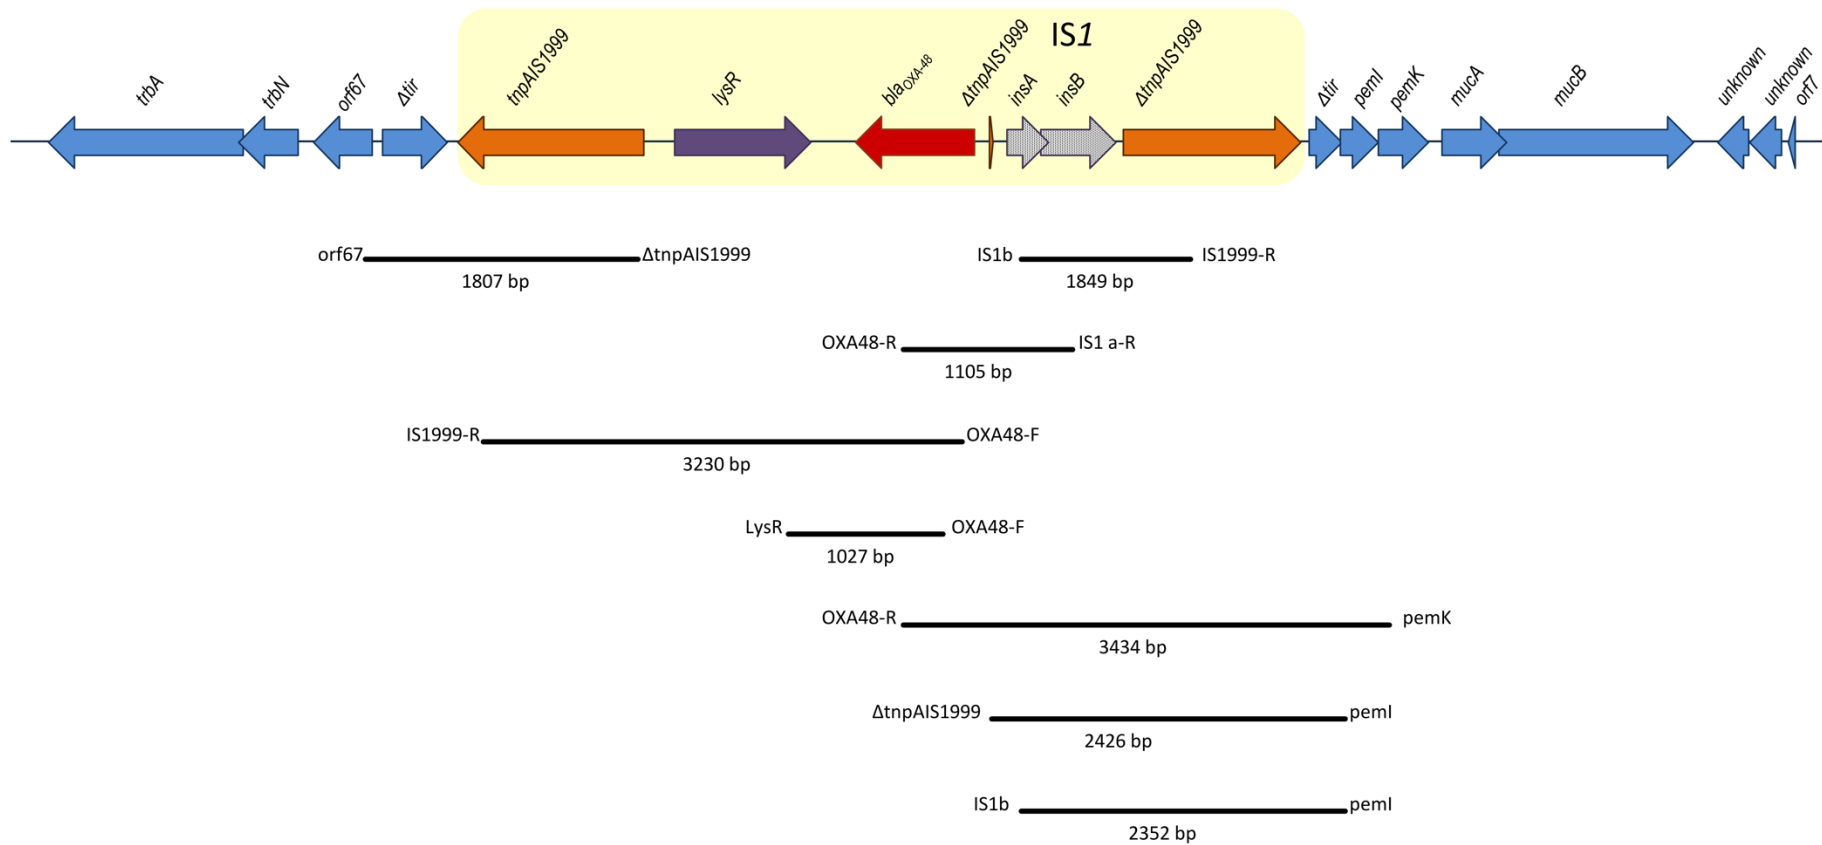

### B. Inverted Tn1999.2 *Ec*-HUCA 1, 2, 3

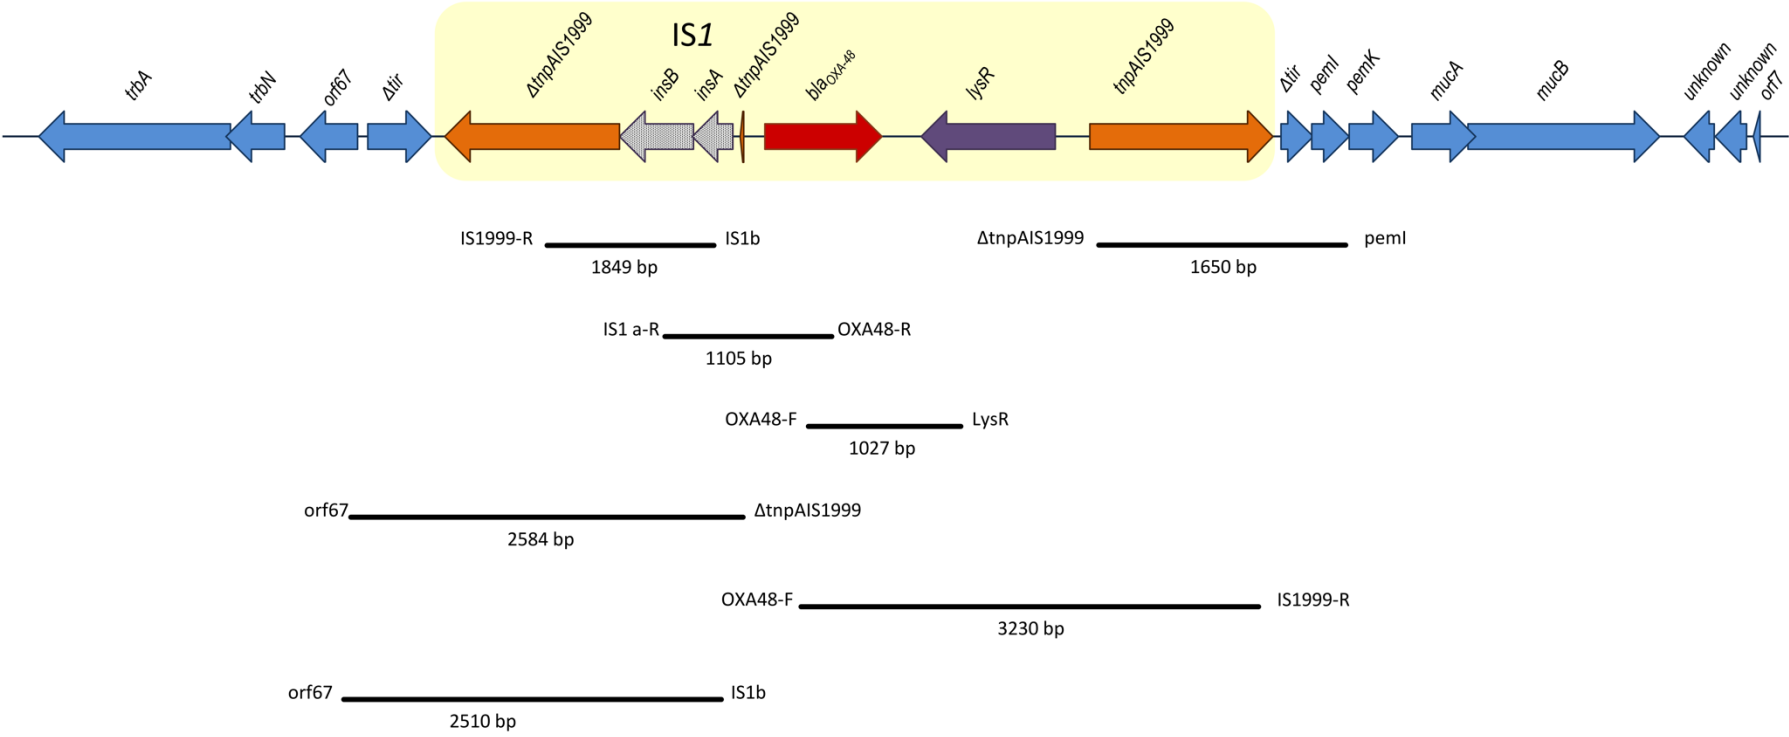

C. Inverted  $\Delta$ Tn1999.2 *Ec*-HUCA 5

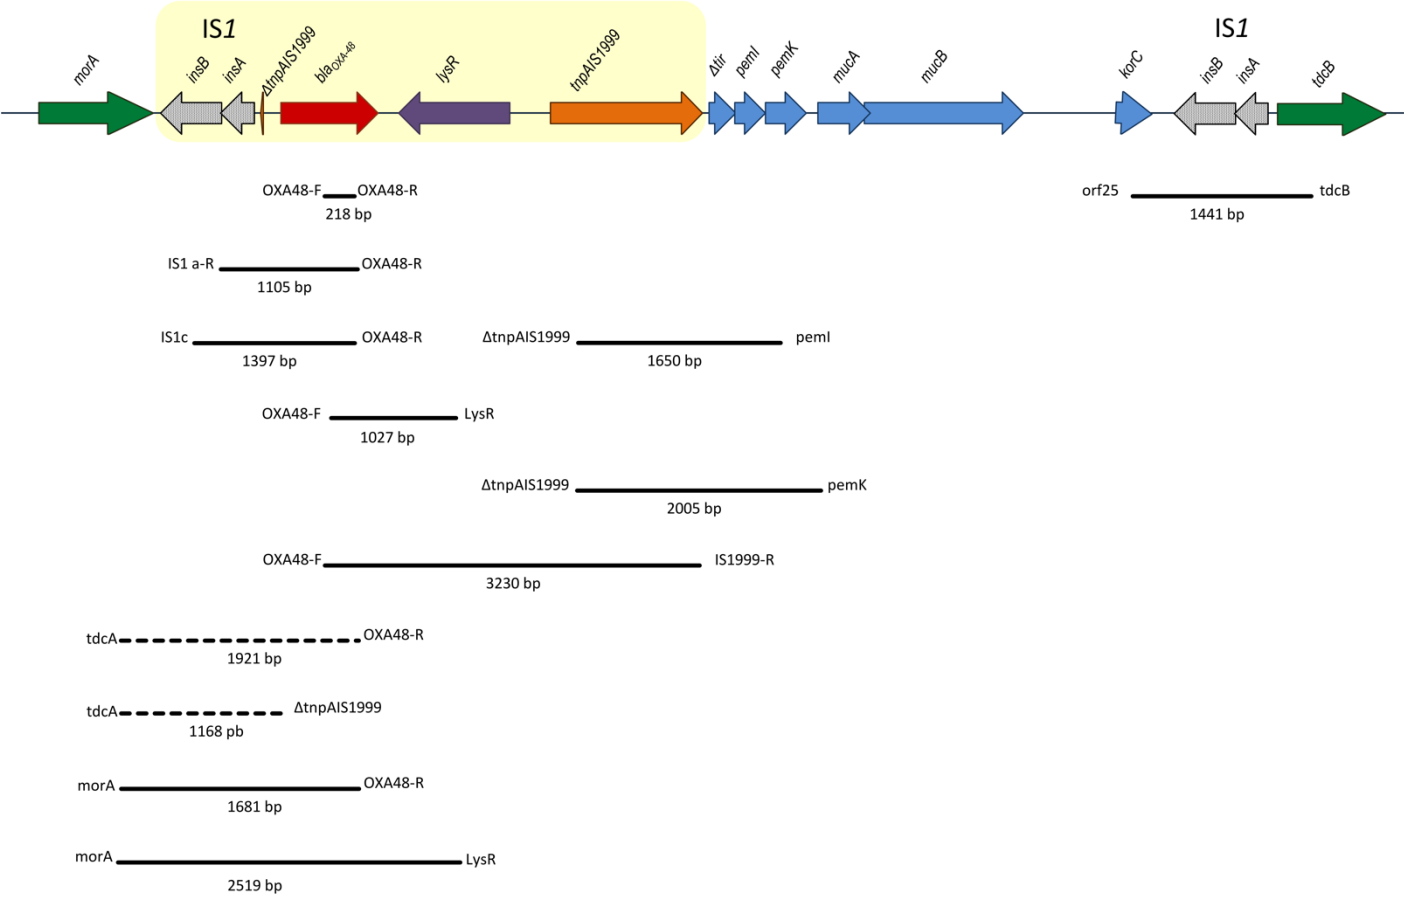

### D. Inverted $\Delta Tn1999.2$ *Ec*-HUCA 6, 7

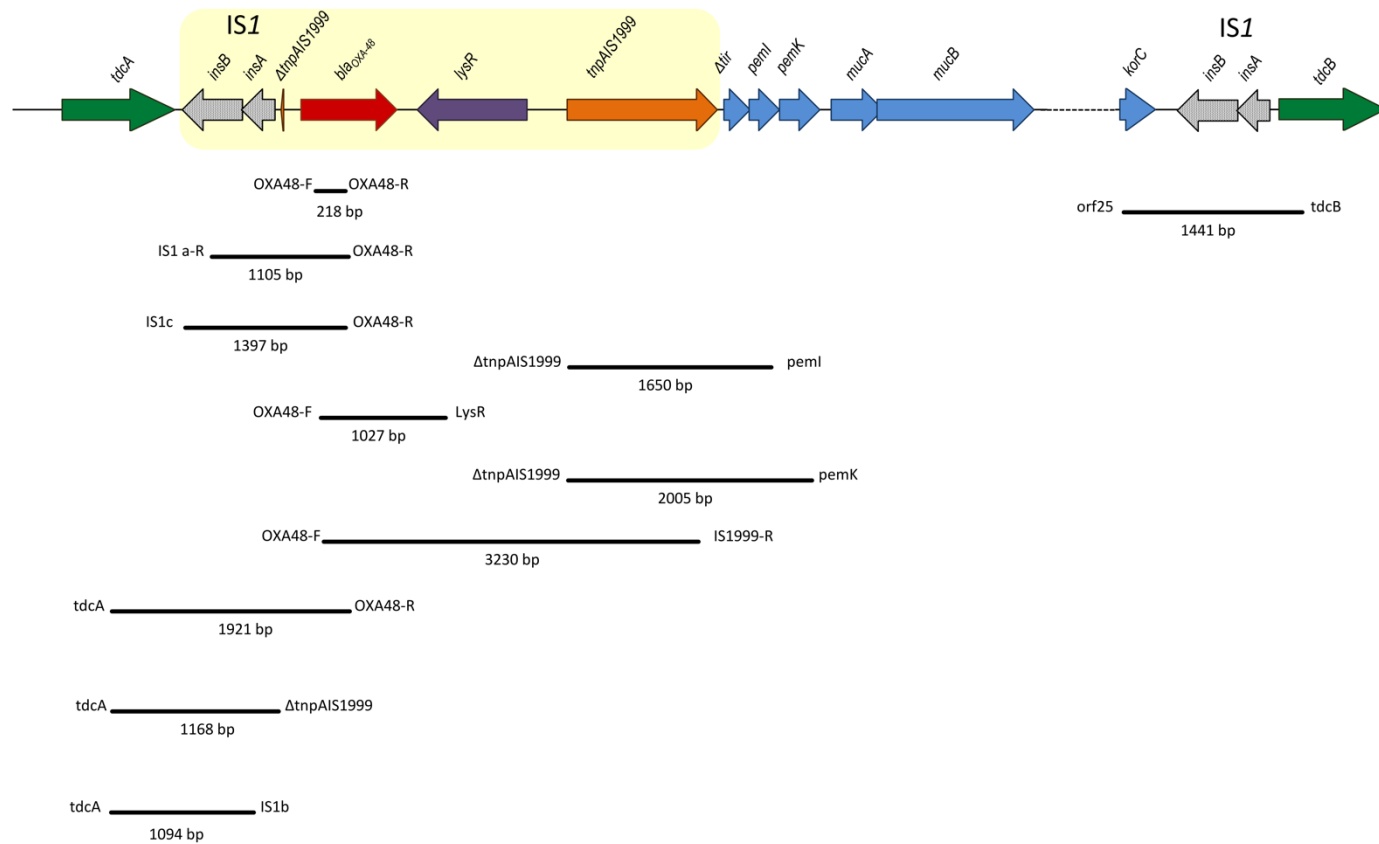

## Supplementary Tables:

**Table S1.** Virulence genes detected by PCR in the seven OXA-48 *Escherichia coli* isolates

| Virulence genes             | <i>Ec</i> -HUCA 1<br>O16:H5<br>B2<br>ST131<br>PST506<br>CH40-41 | <i>Ec</i> -HUCA 2<br>O9:H25<br>B1<br>ST58<br>PST24<br>CH4-27 | <i>Ec</i> -HUCA 3<br>O25:H5<br>B2<br>ST83<br>PST207<br>CH38-21 | <i>Ec</i> -HUCA 4<br>O25b:H4<br>B2<br>ST131<br>PST9<br>CH40-22 | <i>Ec</i> -HUCA 5<br>O25b:H4<br>B2<br>ST131<br>PST43<br>CH40-30 | <i>Ec</i> -HUCA 6<br>O25b:H4<br>B2<br>ST131<br>PST43<br>CH40-30 | <i>Ec</i> -HUCA 7<br>O25b:H4<br>B2<br>ST131<br>PST43<br>CH40-30 |
|-----------------------------|-----------------------------------------------------------------|--------------------------------------------------------------|----------------------------------------------------------------|----------------------------------------------------------------|-----------------------------------------------------------------|-----------------------------------------------------------------|-----------------------------------------------------------------|
| <b>Adhesins</b>             |                                                                 |                                                              |                                                                |                                                                |                                                                 |                                                                 |                                                                 |
| <i>fimC</i>                 | +                                                               | +                                                            | +                                                              | +                                                              | +                                                               | +                                                               | +                                                               |
| <i>fimH</i>                 | +                                                               | +                                                            | +                                                              | +                                                              | +                                                               | +                                                               | +                                                               |
| <i>fimAv<sub>MT78</sub></i> | -                                                               | -                                                            | -                                                              | -                                                              | -                                                               | -                                                               | -                                                               |
| <i>papAH</i>                | -                                                               | -                                                            | +                                                              | +                                                              | +                                                               | +                                                               | +                                                               |
| <i>papC</i>                 | -                                                               | -                                                            | +                                                              | +                                                              | +                                                               | +                                                               | +                                                               |
| <i>papEF</i>                | -                                                               | -                                                            | +                                                              | +                                                              | +                                                               | +                                                               | +                                                               |
| <i>papG I</i>               | -                                                               | -                                                            | -                                                              | -                                                              | -                                                               | -                                                               | -                                                               |
| <i>papG II</i>              | -                                                               | -                                                            | -                                                              | -                                                              | +                                                               | +                                                               | +                                                               |
| <i>papG III</i>             | -                                                               | -                                                            | +                                                              | +                                                              | -                                                               | -                                                               | -                                                               |
| <i>sfa/focDE</i>            | -                                                               | -                                                            | -                                                              | -                                                              | -                                                               | -                                                               | -                                                               |
| <i>afa/draBC</i>            | -                                                               | -                                                            | -                                                              | -                                                              | -                                                               | -                                                               | -                                                               |
| <i>iha</i>                  | +                                                               | -                                                            | -                                                              | +                                                              | +                                                               | +                                                               | +                                                               |
| <i>matB</i>                 | +                                                               | +                                                            | +                                                              | +                                                              | +                                                               | +                                                               | +                                                               |
| <i>yfcV</i>                 | -                                                               | -                                                            | +                                                              | +                                                              | +                                                               | +                                                               | +                                                               |
| <b>Toxins</b>               |                                                                 |                                                              |                                                                |                                                                |                                                                 |                                                                 |                                                                 |
| <i>cnfI</i>                 | -                                                               | -                                                            | -                                                              | +                                                              | +                                                               | +                                                               | +                                                               |
| <i>cdtB</i>                 | -                                                               | -                                                            | +                                                              | -                                                              | -                                                               | -                                                               | -                                                               |
| <i>sat</i>                  | -                                                               | -                                                            | -                                                              | -                                                              | +                                                               | +                                                               | +                                                               |
| <i>tsh</i>                  | -                                                               | -                                                            | -                                                              | -                                                              | -                                                               | -                                                               | -                                                               |
| <i>hlyA</i>                 | -                                                               | -                                                            | -                                                              | +                                                              | +                                                               | +                                                               | +                                                               |
| <i>hlyF</i>                 | -                                                               | +                                                            | -                                                              | +                                                              | -                                                               | -                                                               | -                                                               |
| <i>astA</i>                 | -                                                               | -                                                            | -                                                              | -                                                              | -                                                               | -                                                               | -                                                               |
| <i>pic</i>                  | -                                                               | -                                                            | -                                                              | -                                                              | -                                                               | -                                                               | -                                                               |
| <i>pet</i>                  | +                                                               | -                                                            | +                                                              | +                                                              | +                                                               | +                                                               | +                                                               |
| <i>vat</i>                  | -                                                               | -                                                            | +                                                              | -                                                              | -                                                               | -                                                               | -                                                               |
| <i>tosA</i>                 | -                                                               | -                                                            | -                                                              | -                                                              | -                                                               | -                                                               | -                                                               |
| <b>Iron uptake</b>          |                                                                 |                                                              |                                                                |                                                                |                                                                 |                                                                 |                                                                 |
| <i>iucD</i>                 | -                                                               | +                                                            | -                                                              | +                                                              | +                                                               | +                                                               | +                                                               |
| <i>iutA</i>                 | -                                                               | +                                                            | -                                                              | +                                                              | +                                                               | +                                                               | +                                                               |
| <i>iroN</i>                 | -                                                               | +                                                            | -                                                              | +                                                              | -                                                               | -                                                               | -                                                               |
| <i>fyuA</i>                 | +                                                               | +                                                            | +                                                              | +                                                              | +                                                               | +                                                               | +                                                               |
| <i>chuA</i>                 | +                                                               | -                                                            | +                                                              | +                                                              | +                                                               | +                                                               | +                                                               |
| <i>ireA</i>                 | -                                                               | -                                                            | -                                                              | -                                                              | -                                                               | -                                                               | -                                                               |
| <i>irp2</i>                 | +                                                               | +                                                            | +                                                              | +                                                              | +                                                               | +                                                               | +                                                               |
| <i>sitA</i>                 | +                                                               | +                                                            | +                                                              | +                                                              | +                                                               | +                                                               | +                                                               |
| <i>hma</i>                  | +                                                               | -                                                            | +                                                              | +                                                              | +                                                               | +                                                               | +                                                               |
| <b>Capsule</b>              |                                                                 |                                                              |                                                                |                                                                |                                                                 |                                                                 |                                                                 |
| <i>kii-kpsM II</i>          | +                                                               | -                                                            | +                                                              | +                                                              | +                                                               | +                                                               | +                                                               |
| <i>kpsM II-K2</i>           | +                                                               | -                                                            | -                                                              | -                                                              | -                                                               | -                                                               | -                                                               |
| <i>kpsM II-K5</i>           | -                                                               | -                                                            | +                                                              | +                                                              | +                                                               | +                                                               | +                                                               |
| <i>neuC-K1</i>              | -                                                               | -                                                            | -                                                              | -                                                              | -                                                               | -                                                               | -                                                               |
| <i>kpsM III</i>             | -                                                               | -                                                            | -                                                              | -                                                              | -                                                               | -                                                               | -                                                               |
| <b>Miscellaneous</b>        |                                                                 |                                                              |                                                                |                                                                |                                                                 |                                                                 |                                                                 |
| <i>cvaC</i>                 | -                                                               | +                                                            | -                                                              | +                                                              | -                                                               | -                                                               | -                                                               |
| <i>iss</i>                  | -                                                               | +                                                            | -                                                              | +                                                              | -                                                               | -                                                               | -                                                               |
| <i>traT</i>                 | +                                                               | +                                                            | -                                                              | +                                                              | -                                                               | -                                                               | -                                                               |
| <i>ibeA</i>                 | -                                                               | -                                                            | +                                                              | +                                                              | -                                                               | -                                                               | -                                                               |

|                           |    |    |    |    |    |    |    |
|---------------------------|----|----|----|----|----|----|----|
| <i>malX</i> (PAI)         | +  | -  | +  | +  | +  | +  | +  |
| <i>usp</i>                | +  | -  | +  | +  | +  | +  | +  |
| <i>ompT</i>               | +  | +  | +  | +  | +  | +  | +  |
| <i>betA</i>               | +  | +  | +  | +  | +  | +  | +  |
| <i>hha</i>                | +  | +  | +  | +  | +  | +  | +  |
| <i>Hha2</i>               | +  | -  | -  | +  | +  | +  | +  |
| <i>Hha3</i>               | +  | -  | -  | -  | +  | +  | +  |
| <sup>a</sup> ExPEC status | -  | -  | +  | +  | +  | +  | +  |
| <sup>b</sup> UPEC status  | -  | +  | +  | +  | +  | +  | +  |
| Number of VG (n=50)       | 20 | 16 | 24 | 33 | 29 | 29 | 29 |

<sup>a</sup>Strains presumptively regarded as extraintestinal pathogenic *E. coli* (ExPEC) since they were positive for two or more of five markers, including *papAH* and/or *papC*, *sfa/focDE*, *afa/draBC*, *kpsM II* and *iutA*<sup>2,3</sup>.

<sup>b</sup>Strains presumptively regarded as uropathogenic *E. coli* (UPEC) because they were positive for three or more of four markers, including *chuA*, *fyuA*, *vat* and *yfcV*<sup>3,4</sup>.

**Table S2.** Associations of molecular types, virulence-gene profiles and virulence patterns in the murine sepsis model of the 7 OXA-48 producing *Escherichia coli* isolates.

| Isolate code      | Serotype | Phylo-group | Virotype <sup>a</sup> | AST /PST <sup>b</sup> | Lethality <sup>c</sup> ≤24 h | Lethality <sup>d</sup> 25 h–48 h | Final <sup>e</sup> lethality | Lesion = Type – degree (No) <sup>f</sup>                    | VG score <sup>g</sup> | ExPEC status <sup>h</sup> |
|-------------------|----------|-------------|-----------------------|-----------------------|------------------------------|----------------------------------|------------------------------|-------------------------------------------------------------|-----------------------|---------------------------|
| <i>Ec</i> -HUCA 1 | O16:H5   | B2          | NT                    | 131 / 506             | 0                            | 0                                | 0                            | Abscess ++ (8); necrosis + (2)                              | 20                    | -                         |
| <i>Ec</i> -HUCA 2 | O9:H25   | B1          | NA                    | 58 / 24               | 0                            | 0                                | 1                            | Abscess +++(3); Abscess ++ (3); necrosis ++ (3)             | 16                    | -                         |
| <i>Ec</i> -HUCA 3 | O25a:H5  | B2          | NA                    | 83 /207               | 0                            | 0                                | 0                            | Abscess ++ (6); Abscess and necrosis ++ (4)                 | 24                    | +                         |
| <i>Ec</i> -HUCA 4 | O25b:H4  | B2          | D5                    | 131 / 9               | 0                            | 0                                | 0                            | Necrosis +++ (8); necrosis ++++ (2)                         | 33                    | +                         |
| <i>Ec</i> -HUCA 5 | O25b:H4  | B2          | E                     | 131 /43               | 0                            | 0                                | 0                            | Abscess and necrosis +++ (8); Abscess and necrosis ++++ (2) | 29                    | +                         |
| <i>Ec</i> -HUCA 6 | O25b:H4  | B2          | E                     | 131 /43               | 1                            | 0                                | 1                            | Abscess and necrosis +++ (8); Abscess and necrosis ++++ (1) | 29                    | +                         |
| <i>Ec</i> -HUCA 7 | O25b:H4  | B2          | E                     | 131 /43               | 0                            | 0                                | 1                            | Abscess and necrosis +++ (8); Abscess and necrosis ++++ (1) | 29                    | +                         |
| CFT-073           | O6:H1    | B2          | NA                    | 73 / 4                | 4                            | 6                                | 10                           | None                                                        | *                     | +                         |
| K12-MG1655        | O16:H48  | A           | NA                    | 98 / 262              | 0                            | 0                                | 0                            | None                                                        | *                     | -                         |

<sup>a</sup>Virotypes of the ST131 isolates established based on the presence or absence of 13 VF according to the scheme described by Dahbi *et al.*<sup>1</sup>

Virulence profile of the O16:H5-ST131 isolate did not match any virotype of the scheme, so it was showed as NT (not typeable); NA (not applicable) for those non-ST131 isolates.

<sup>b</sup>Sequence types (STs) according to Achtman (AST) and Pasteur schemes (PST), respectively.

<sup>c</sup>Number of mice dead within 24 h postinjection.

<sup>d</sup>Number of mice dead within 25–48 h postinjection.

<sup>°</sup>Total number of mice dead within 7 days of experiment. For each isolate, 10 outbred female RjOrl:Swiss mice (3–4 weeks old; Janvier Labs, France) were assayed.

<sup>†</sup>Type and number of mice with acute inflammatory response in the neck region when euthanized of those 10 assayed for each isolate. Type = abscess / necrosis; degree and extension = + to ++++.

<sup>§</sup>Virulence-gene (VG) score calculated as the sum of virulence genes detected out of the 50 analyzed by PCR per isolate; \*For control strains, only a reduced number of virulence genes (23) was screened; as a result, CFT-073 was positive for *fimH papG II focG hlyA sat iutA iucD iron kpsM II-K5 malX usp* and K12-MG1655 only for *fimH*.

<sup>h</sup>ExPEC status (+) defined as presence of two or more of five markers, including *papAH* and/or *papC*, *sfa/focDE*, *afa/draBC*, *kpsM II* and *iutA*<sup>2,3</sup>.



**Table S3.-** SNP numbers are approximate averages of individual comparisons between each pair of genomes represented on Figure 4.

|              | AZ-TG-713-2 | AZ-TG-WCHI- | AZ-TG56421 | BIDMC20E | BIDMC38 | BWH24 | CFSAN046659 | E2021 | E35BA | E61BA | EC088 | Ee-HUCA1 | Ee-HUCA2 | Ee-HUCA3 | Ee-HUCA4 | Ee-HUCA5 | Ee-HUCA6 | Ee-HUCA7 | ECOR-66 | ESC023C | Eco889 | Ecol_448 | Ecol_743 | FV9873 | HVH177 | JJ1884 | JJ1887 | JJ2434 | KFu033 | KKc004 | MNCRE44 | PNUSAE00413 | SE15  | ZH063 | lupcc-58 |       |
|--------------|-------------|-------------|------------|----------|---------|-------|-------------|-------|-------|-------|-------|----------|----------|----------|----------|----------|----------|----------|---------|---------|--------|----------|----------|--------|--------|--------|--------|--------|--------|--------|---------|-------------|-------|-------|----------|-------|
| AZ-TG-713-2  |             | 2940        | 3709       | 79276    | 79219   | 79276 | 3100        | 79268 | 79246 | 80784 | 79202 | 79715    | 4564     | 80923    | 80787    | 79247    | 79253    | 79253    | 80764   | 80758   | 79668  | 79666    | 79679    | 79214  | 80752  | 79195  | 79165  | 79206  | 2756   | 80843  | 79273   | 4426        | 80353 | 80663 | 81115    |       |
| AZ-TG-WCHI-2 | 2940        |             | 2671       | 79335    | 79278   | 79335 | 1960        | 79327 | 79305 | 80710 | 79261 | 79569    | 3946     | 80806    | 80713    | 79306    | 79312    | 79312    | 80674   | 80668   | 79522  | 79520    | 79541    | 79273  | 80678  | 79254  | 79224  | 79266  | 1470   | 80763  | 79332   | 3885        | 80215 | 80583 | 80992    |       |
| AZ-TG56421   | 3709        | 2671        |            | 79612    | 79555   | 79612 | 2601        | 79604 | 79582 | 80987 | 79538 | 79842    | 3511     | 81076    | 80990    | 79583    | 79589    | 79589    | 80980   | 80974   | 79795  | 79793    | 79806    | 79550  | 80955  | 79531  | 79501  | 79542  | 2461   | 81059  | 79609   | 3725        | 80480 | 80866 | 81273    |       |
| BIDMC20B     | 79276       | 79335       | 79612      |          | 224     | 6     | 79632       | 122   | 229   | 3783  | 207   | 8341     | 79666    | 19809    | 3791     | 188      | 194      | 194      | 19999   | 19993   | 8350   | 8352     | 9008     | 219    | 3768   | 131    | 157    | 117    | 79470  | 20047  | 170     | 79708       | 8522  | 4026  | 19963    |       |
| BIDMC38      | 79219       | 79278       | 79555      | 224      |         | 224   | 79575       | 220   | 233   | 3775  | 31    | 8210     | 79609    | 19742    | 3796     | 250      | 256      | 256      | 19932   | 19926   | 8219   | 8221     | 8942     | 43     | 3760   | 223    | 249    | 215    | 79413  | 19980  | 252     | 79651       | 8514  | 4122  | 19958    |       |
| BWH24        | 79276       | 79335       | 79612      | 6        | 224     |       | 79632       | 122   | 229   | 3783  | 207   | 8341     | 79666    | 19809    | 3791     | 188      | 194      | 194      | 19999   | 19993   | 8350   | 8352     | 9008     | 219    | 3768   | 131    | 157    | 117    | 79470  | 20047  | 170     | 79708       | 8522  | 4026  | 19963    |       |
| CFSAN046659  | 3100        | 1960        | 2601       | 79632    | 79575   | 79632 |             | 79624 | 79602 | 81007 | 79558 | 79851    | 3832     | 81096    | 81010    | 79603    | 79609    | 79609    | 80945   | 80939   | 79804  | 79802    | 79822    | 79570  | 80975  | 79551  | 79521  | 79562  | 1835   | 81025  | 79629   | 3953        | 80496 | 80879 | 81267    |       |
| E2022        | 79268       | 79327       | 79604      | 122      | 220     | 122   | 79624       |       | 223   | 3775  | 203   | 8335     | 79658    | 19803    | 3785     | 182      | 188      | 188      | 19993   | 19987   | 8344   | 8346     | 9002     | 213    | 3762   | 125    | 151    | 103    | 79462  | 20041  | 164     | 79700       | 8516  | 4020  | 19957    |       |
| E35BA        | 79246       | 79305       | 79582      | 229      | 233     | 229   | 79602       | 223   |       | 3745  | 216   | 8348     | 79636    | 19756    | 3751     | 233      | 239      | 239      | 19946   | 19940   | 8357   | 8359     | 8991     | 226    | 3732   | 230    | 256    | 218    | 79440  | 19994  | 238     | 79678       | 8486  | 4127  | 19924    |       |
| E61BA        | 80784       | 80710       | 80987      | 3783     | 3775    | 3783  | 81007       | 3775  | 3745  |       | 3758  | 8017     | 81127    | 18093    | 192      | 3757     | 3763     | 3763     | 18283   | 18277   | 8026   | 8028     | 8701     | 3770   | 151    | 3752   | 3778   | 3772   | 80831  | 18330  | 3785    | 81169       | 6673  | 1016  | 17401    |       |
| EC958        | 79202       | 79261       | 79538      | 207      | 31      | 207   | 79558       | 203   | 216   | 3758  |       | 8193     | 79592    | 19725    | 3779     | 233      | 239      | 239      | 19915   | 19909   | 8202   | 8204     | 8925     | 26     | 3743   | 206    | 232    | 198    | 79396  | 19963  | 235     | 79634       | 8497  | 4105  | 19941    |       |
| Ee-HUCA1     | 79715       | 79569       | 79842      | 8341     | 8210    | 8341  | 79851       | 8335  | 8348  | 8017  | 8193  |          | 79869    | 19554    | 8038     | 8331     | 8337     | 8337     | 19962   | 19956   | 93     | 93       | 1317     | 8205   | 8002   | 8262   | 8288   | 8330   | 79744  | 19650  | 8347    | 79889       | 1704  | 8325  | 19848    |       |
| Ee-HUCA2     | 4564        | 3946        | 3511       | 79666    | 79609   | 79666 | 3832        | 79658 | 79636 | 81127 | 79592 | 79869    |          | 81228    | 81128    | 79637    | 79643    | 79643    | 81199   | 81193   | 79856  | 79867    | 79604    | 81093  | 79585  | 79589  | 79630  | 3660   | 81239  | 79663  | 1466    | 80541       | 81038 | 81485 |          |       |
| Ee-HUCA3     | 80923       | 80806       | 81076      | 19809    | 19742   | 19809 | 81096       | 19803 | 19756 | 18093 | 19725 | 19554    | 81228    |          | 18076    | 19784    | 19790    | 19790    | 1034    | 1040    | 19543  | 19543    | 19996    | 19737  | 18058  | 19767  | 19773  | 19778  | 80962  | 847    | 19816   | 81260       | 19705 | 18211 | 2704     |       |
| Ee-HUCA4     | 80787       | 80713       | 80990      | 3791     | 3796    | 3791  | 81010       | 3785  | 3751  | 192   | 3779  | 8038     | 81128    | 18076    |          | 3752     | 3758     | 3758     | 18266   | 18260   | 8047   | 8049     | 8725     | 3791   | 299    | 3760   | 3786   | 3780   | 80834  | 18313  | 3785    | 81170       | 6821  | 1024  | 17539    |       |
| Ee-HUCA5     | 79247       | 79306       | 79583      | 188      | 250     | 188   | 79603       | 182   | 233   | 3757  | 233   | 8331     | 79637    | 19784    | 3752     |          | 14       | 14       | 19973   | 19967   | 8340   | 8342     | 8979     | 245    | 3742   | 187    | 213    | 177    | 79441  | 20023  | 198     | 79679       | 8500  | 4036  | 19934    |       |
| Ee-HUCA6     | 79253       | 79312       | 79589      | 194      | 256     | 194   | 79609       | 188   | 239   | 3763  | 239   | 8337     | 79643    | 19790    | 3758     | 14       |          | 2        | 19979   | 19973   | 8346   | 8348     | 8985     | 251    | 3748   | 193    | 219    | 183    | 79447  | 20029  | 204     | 79685       | 8506  | 4042  | 19940    |       |
| ECOR-66      | 79253       | 79312       | 79589      | 194      | 256     | 194   | 79609       | 188   | 239   | 3763  | 239   | 8337     | 79643    | 19790    | 3758     | 14       | 2        |          | 19979   | 19973   | 8346   | 8348     | 8985     | 251    | 3748   | 193    | 219    | 183    | 79447  | 20029  | 204     | 79685       | 8506  | 4042  | 19940    |       |
| Eco889       | 79668       | 79522       | 79795      | 8350     | 8219    | 8350  | 79804       | 8344  | 8357  | 8026  | 8202  | 93       | 79856    | 19543    | 8047     | 8340     | 8346     | 8346     | 19915   | 19909   |        | 48       | 48       | 1262   | 8214   | 7991   | 8271   | 8241   | 8283   | 79697  | 19603   | 8355        | 79842 | 1657  | 8278     | 19801 |
| Ecol_448     | 79666       | 79520       | 79793      | 8352     | 8221    | 8352  | 79802       | 8346  | 8359  | 8028  | 8204  | 93       | 79854    | 19543    | 8049     | 8342     | 8348     | 8348     | 19915   | 19909   | 48     |          | 1272     | 8216   | 7991   | 8273   | 8243   | 8285   | 79695  | 19603  | 8358    | 79840       | 1657  | 8278  | 19801    |       |
| Ecol_743     | 79679       | 79541       | 79806      | 9008     | 8942    | 9008  | 79822       | 9002  | 8991  | 8701  | 8925  | 1317     | 79867    | 19996    | 8725     | 8979     | 8985     | 8985     | 20368   | 20362   | 1262   | 1272     |          | 8937   | 8666   | 8953   | 8923   | 8941   | 79708  | 20056  | 9012    | 79853       | 2322  | 8987  | 20367    |       |
| FV9873       | 79214       | 79273       | 79550      | 219      | 43      | 219   | 79570       | 213   | 226   | 3770  | 26    | 8205     | 79604    | 19737    | 3791     | 245      | 251      | 251      | 19927   | 19921   | 8214   | 8216     | 8937     |        | 3755   |        | 218    | 244    | 210    | 79408  | 19975   | 247         | 79646 | 8509  | 4117     | 19953 |
| HVH177       | 80752       | 80678       | 80955      | 3768     | 3760    | 3768  | 80975       | 3762  | 3732  | 151   | 3743  | 8002     | 81093    | 18058    | 299      | 3742     | 3748     | 3748     | 18248   | 18242   | 7991   | 7991     | 8666     | 3755   |        | 3737   | 3743   | 3737   | 79408  | 18295  | 3770    | 81135       | 6636  | 979   | 17366    |       |
| JJ1886       | 79195       | 79254       | 79531      | 131      | 223     | 131   | 79551       | 125   | 230   | 3752  | 206   | 8262     | 79585    | 19767    | 3760     | 187      | 193      | 193      | 19957   | 19951   | 8271   | 8273     | 8953     | 218    | 3737   |        | 30     | 120    | 79389  | 20005  | 169     | 79627       | 8491  | 3997  | 19932    |       |
| JJ1887       | 79165       | 79224       | 79501      | 157      | 249     | 157   | 79521       | 151   | 256   | 3778  | 232   | 8288     | 79589    | 19773    | 3786     | 213      | 219      | 219      | 19927   | 19921   | 8241   | 8243     | 8923     | 244    | 3743   | 30     |        | 90     | 79359  | 19975  | 195     | 79597       | 8461  | 3967  | 19902    |       |
| JJ2434       | 79206       | 79266       | 79542      | 117      | 215     | 117   | 79562       | 103   | 218   | 3772  | 198   | 8330     | 79630    | 19778    | 3780     | 177      | 183      | 183      | 19932   | 19926   | 8283   | 8285     | 8941     | 210    | 3737   | 120    | 90     |        | 79400  | 19980  | 159     | 79638       | 8455  | 3959  | 19896    |       |
| KFu033       | 2756        | 1470        | 2461       | 79470    | 79413   | 79470 | 1835        | 79462 | 79440 | 80831 | 79396 | 79744    | 3660     | 80962    | 80834    | 79441    | 79447    | 79447    | 80877   | 80871   | 79697  | 79695    | 79708    | 79408  | 80805  | 79389  | 79359  | 79400  |        | 80920  | 79467   | 3620        | 80382 | 80724 | 81166    |       |
| KKc004       | 80843       | 80763       | 81059      | 20047    | 19980   | 20047 | 81025       | 20041 | 19994 | 18330 | 19963 | 19650    | 81239    | 847      | 18313    | 20023    | 20029    | 20029    | 1217    | 1223    | 19603  | 19603    | 20056    | 19975  | 18295  | 20005  | 19975  | 19980  | 80920  |        | 20054   | 81227       | 19765 | 18415 | 2610     |       |
| MNCRE44      | 79273       | 79332       | 79609      | 170      | 252     | 170   | 79629       | 164   | 238   | 3785  | 235   | 8347     | 79663    | 19816    | 3785     | 198      | 204      | 204      | 20006   | 20000   | 8355   | 8358     | 9012     | 247    | 3770   | 169    | 195    | 159    | 79467  | 20054  |         | 79705       | 8524  | 4048  | 19963    |       |
| PNUSAE00413  | 4426        | 3885        | 3725       | 79708    | 79651   | 79708 | 3953        | 79700 | 79678 | 81169 | 79634 | 79889    | 1466     | 81260    | 81170    | 79679    | 79685    | 79685    | 81189   | 81183   | 79842  | 79840    | 79853    | 79646  | 81135  | 79627  | 79597  | 79638  | 3620   | 81227  | 79705   |             | 80527 | 81046 | 81437    |       |
| SE15         | 80353       | 80215       | 80480      | 8522     | 8514    | 8522  | 80496       | 8516  | 8486  | 6673  | 8497  | 1704     | 80541    | 19705    | 6821     | 8500     | 8506     | 8506     | 20077   | 20071   | 1657   | 1657     | 2322     | 8509   | 6636   | 8491   | 8461   | 8455   | 80382  | 19765  | 8524    | 80527       | 7407  | 18791 |          |       |
| ZH063        | 80663       | 80583       | 80866      | 4026     | 4122    | 4026  | 80879       | 4020  | 4127  | 1016  | 4105  | 8325     | 81038    | 18211    | 1024     | 4036     | 4042     | 4042     | 18366   | 18360   | 8278   | 8278     | 8987     | 4117   | 979    | 3997   | 3967   | 3959   | 80724  | 18415  | 4048    | 81046       | 7     |       |          |       |

**Table S4.** Primers used to establish the genetic context of the *bla*<sub>OXA-48</sub> gene.

| Primer name         | Sequence (5'-3')       | Reference  |
|---------------------|------------------------|------------|
| MultiOXA-48_fo      | GCTTGATCGCCCTCGATT     | 5          |
| MultiOXA-48_rev     | GATTTGCTCCGTGGCCGAAA   | 5          |
| IS1999-R            | CAGCAATTCTTTCTCCGTG    | 6          |
| $\Delta$ tnpAIS1999 | ATGCGCGAAGCCAATATCCTAC | This study |
| LysR                | GCTAGTGCCAATCTTACAGG   | 6          |
| IS1a-R              | GTAAACAGCCAGCGCTGGCGCG | 7          |
| IS1 b               | TGAGGTGCTCCAGTGGCTTC   | This study |
| IS1 c               | GCCCGATGACTTTGTCATGC   | This study |
| pemI                | TGACCATGCCAACTTCATT    | 6          |
| orf25               | GGAAATAGCAGCGCAAAA     | 6          |
| orf67               | CAGCCAGAATAAGAGCAATC   | 6          |
| tdcA                | AGAACGAACAGTGGGTGTTG   | This study |
| tdcB                | TTCCGCATCAGTCAGTGAAC   | This study |
| morA                | GATGGGCATCTGCAATACTC   | This study |

**Table S5.** Primers used in this study for PCR amplification of virulence genes

| Gene                        | Function                                                                                         | Primer name            | Sequence (5'-3')                                        | Reference |
|-----------------------------|--------------------------------------------------------------------------------------------------|------------------------|---------------------------------------------------------|-----------|
| <b>Adhesins</b>             |                                                                                                  |                        |                                                         |           |
| <i>fimC</i>                 | D-mannose-specific adhesion, type 1 fimbriae                                                     | fimC-F<br>fimC-R       | TAAGGAAATCGCAGGAA<br>GTCAGGTAATAGGGTGTCTG               | 8         |
| <i>fimH</i>                 | D-mannose-specific adhesion, type 1 fimbriae                                                     | fimH-F<br>fimH-R       | TGCAGAACGGATAAGCCGTGG<br>GCAGTCACCTGCCCTCCGGTA          | 9         |
| <i>fimAv<sub>MT78</sub></i> | Fim A variant MT78 of type 1 fimbriae                                                            | fimA215<br>fimA201     | ACTTTAGGATGAGTACTG<br>TCTGGCTGATACTACACC                | 10        |
| <i>papAH</i>                | P fimbriae (pyelonephritis-associated pilus) operon. Major structural subunit. Defines F antigen | papAH-F<br>papAH-R     | ATGGCAGTGGTGTCTTTTGGTG<br>CGTCCCACCATACGTGCTCTTC        | 2         |
| <i>papC</i>                 | P fimbriae operon. Pilus assembly                                                                | papC-F<br>papC-R       | GTGGCAGTATGAGTAATGACCGTTA<br>ATATCCTTTCTGCAGGGATGCAATA  | 2         |
| <i>papEF</i>                | P fimbriae operon. Minor tip pilins. Connect PapG to PapA                                        | papEF-F<br>papEF-R     | GCAACAGCAACGCTGGTTGCATCAT<br>AGAGAGAGCCACTCTTATACGGACA  | 11        |
| <i>papG I</i>               | P fimbriae operon. Allele I of <i>papG</i> gene                                                  | Pap-I f<br>Pap-I r     | TTAGCTGGATGGCACAATG<br>TTGTCCATGTATCCCATTTCAT           | 12        |
| <i>papG II</i>              | P fimbriae operon. Allele II of <i>papG</i> gene                                                 | Pap-II f<br>Pap-II r   | GGGCATTGCTACGGTAACCTG<br>CGTATTAATAGACAGATCACC          | 12        |
| <i>papG III</i>             | P fimbriae operon. Allele III of <i>papG</i> gene                                                | Pap-III f<br>Pap-III r | CGGCAACTTTAAGCTATGTG<br>TGTACCATCTCATCGTTGTCTC          | 12        |
| <i>sfa/focDE</i>            | Central region of <i>sfa</i> (S fimbriae) and <i>foc</i> (F1C fimbriae) operons                  | sfa1<br>sfa2           | CTCCGGAGAACTGGGTGCATCTTAC<br>CGGAGGAGTAATTACAAACCTGGCA  | 13        |
| <i>afa/draBC</i>            | Dr antigen-specific adhesion operons (AFA, Dr, F1845)                                            | afa1<br>afa2           | GCTGGGCAGCAAAGCTGATAACTCTC<br>CATCAAGCTGTTTGTTCGTCGCCCG | 13        |
| <i>iha</i>                  | Nonhemagglutinin adhesion (from O157:H7 and CFT073)                                              | iha-F<br>iha-R         | CTGGCGGAGGCTCTGAGATCA<br>TCCTTAAGCTCCCGCGGCTGA          | 2         |

|                    |                                                              |                                        |                                                                                                                  |    |
|--------------------|--------------------------------------------------------------|----------------------------------------|------------------------------------------------------------------------------------------------------------------|----|
| <i>matB</i>        | Meningitis and temperature-dependent fimbriae                | matB-F<br>matB-R                       | TTAACTGGTCCAGGTCGCGT<br>ATGAAAAAAAAAGGTTCTGGCA                                                                   | 14 |
| <i>yfcV</i>        | Putative chaperone-usher fimbria                             | yfcV<br>forward<br>yfcV reverse        | ACATGGAGACCACGTTCCACC<br>GTAATCTGGAATGTGGTCAGG                                                                   | 15 |
| <b>Toxins</b>      |                                                              |                                        |                                                                                                                  |    |
| <i>cnfI</i>        | Cytotoxic necrotizing factor 1                               | cnfI-f2<br>cnfI-rc                     | CAGGAGGTACTTAGCAGCGT<br>TAATTTTGGGTTTGTATC                                                                       | 12 |
| <i>cdtB</i>        | Cytolethal distending toxin                                  | cdt-s1<br>cdt-as1<br>cdt-s2<br>cdt-as2 | GAAAGTAAATGGAATATAAATGTCCG<br>AAATCACCAAGAATCATCCAGTTA<br>GAAAATAAATGGAACACACATGTCCG<br>AAATCTCCTGCAATCATCCAGTTA | 16 |
| <i>sat</i>         | Secreted autotransporter toxin                               | satF<br>satR                           | GCAGTACCGCAATAGGAGGT<br>CATTAGAGTACCGGGGCCTA                                                                     | 17 |
| <i>tsh</i>         | Temperature-sensitive hemagglutinin. Serine protease         | tsh03<br>tsh15                         | GGTGGTGCCTGGAGTGG<br>AGTCCAGCGTGATAGTGG                                                                          | 18 |
| <i>hlyA</i>        | $\alpha$ -hemolysin                                          | hly f<br>hly r                         | AACAAGGATAAGCACTGTTCTGGCT<br>ACCATATAAGCGGTCATTCCCGTCA                                                           | 11 |
| <i>hlyF</i>        | Hemolysin F                                                  | hlyF f<br>hlyF r                       | TCGTTTAGGGTGCTTACCTTCAAC<br>TTTGCGGTTTAGGCATTCC                                                                  | 19 |
| <i>astA</i>        | (EAST 1) enteroaggregative <i>E. coli</i> heat stable toxin  | astA forward<br>astA reverse           | CCATCAACACAGTATATCCG<br>GGTCGCGAGTGACGGCTTTG                                                                     | 2  |
| <i>pic</i>         | Protein involved in intestinal colonization. Serine protease | pic forward<br>pic reverse             | GGGTATTGTCCGTTCCGAT<br>ACAACGATACCGTCTCCCG                                                                       | 2  |
| <i>pet</i>         | Plasmid-encoded toxin                                        | pet forward<br>pet reverse             | GACCATGACCTATACCGACAGC<br>CCGATTTCTCAAACCTCAAGACC                                                                | 20 |
| <i>vat</i>         | Vacuolating autotransporter toxin. Serine protease           | vat forward<br>vat reverse             | TCAGGACACGTTTCAGGCATTAGT<br>GGCCAGAACATTTGCTCCCTTGTT                                                             | 15 |
| <i>tosA</i>        | In vivo-induced repeat-in toxin (RTX) family member          | tosA forward<br>tosA reverse           | TGGGCATTCTGATGCTGCTGACTA<br>TTGTTCCGTCTGGCCATTATCCT                                                              | 21 |
| <b>Iron uptake</b> |                                                              |                                        |                                                                                                                  |    |

|                    |                                                                     |                                 |                                                       |    |
|--------------------|---------------------------------------------------------------------|---------------------------------|-------------------------------------------------------|----|
| <i>iucD</i>        | Aerobactin                                                          | Aer f<br>Aer r                  | TACCGGATTGTCATATGCAGACCGT<br>AATATCTTCTCCAGTCCGGAGAAG | 11 |
| <i>iutA</i>        | Ferric aerobactin receptor (iron uptake transport)                  | aer-851f<br>aer-1152r           | GGCTGGACATCATGGGAACTGG<br>CGTCGGGAACGGGTAGAATCG       | 9  |
| <i>iroN</i>        | Catecholate (salmochelin) siderophore receptor                      | Ironec-f<br>Ironec-r            | AAGTCAAAGCAGGGGTTGCCCG<br>GACGCCGACATTAAGACGCAG       | 9  |
| <i>fyuA</i>        | <i>Yersinia</i> siderophore receptor (ferric yersiniabactin uptake) | fyuA<br>forward<br>fyuA reverse | GTAAACAATCTTCCCCTCGGCAT<br>TGACGATTAACGAACCGGAAGGGA   | 15 |
| <i>chuA</i>        | Heme binding outer membrane                                         | chuA-ITU-F<br>chuA-ITU-R        | CTGAAACCATGACCGTTACG<br>TTGTAGTAACGCACTAAACC          | 15 |
| <i>ireA</i>        | Iron-regulated element (siderophore receptor)                       | ireA-F<br>ireA-R                | GATGACTCAGCCACGGGTAA<br>CCAGGACTCACCTCACGAAT          | 2  |
| <i>irp2</i>        | Iron-repressible protein (In HPI)                                   | irp2-F<br>irp2-R                | AAGGATTTCGCTGTTACCGGAC<br>TCGTCCGGCAGCGTTTCTTCT       | 22 |
| <i>sitA</i>        | Iron uptake system                                                  | sitA-F<br>sitA-R                | AGGGGGCACAACCTGATTCTCG<br>TACCGCGCCGTTTTCTGTGC        | 23 |
| <i>hma</i>         | Heme uptake                                                         | hma-F<br>hma-R                  | ACATTGCAGAACTCCACCAATGCC<br>TTGATTCTTCCCAGCCTGCTGTTG  | 21 |
| <b>Capsule</b>     |                                                                     |                                 |                                                       |    |
| <i>kii-kpsM II</i> | Group II capsule                                                    | KpsII f<br>KpsII r              | GCGCATTTGCTGATACTGTTG<br>CATCCAGACGATAAGCATGAGCA      | 9  |
| <i>kpsM II-K2</i>  | K2 variant of group II capsule                                      | kpsII f<br>KpsII-K2r            | GCGCATTTGCTGATACTGTTG<br>AGGTAGTTCAGACTCACACCT        | 24 |
| <i>kpsM II-K5</i>  | K5 variant of group II capsule                                      | K5 f<br>kpsII r                 | CAGTATCAGCAATCGTTCTGTA<br>CATCCAGACGATAAGCATGAGCA     | 9  |
| <i>neuC-K1</i>     | K1 variant of group II capsule                                      | neu1<br>neu2                    | AGGTGAAAAGCCTGGTAGTGTG<br>GGTGGTACATCCCAGGATGTC       | 25 |
| <i>kpsM III</i>    | Group III capsule                                                   | kps III f<br>kps III r          | TCCTCTTGCTACTATTCCCCCT<br>AGGCGTATCCATCCCTCCTAAC      | 9  |

| Miscellaneous        |                                                                                                               |                                  |                                                  |    |
|----------------------|---------------------------------------------------------------------------------------------------------------|----------------------------------|--------------------------------------------------|----|
| <i>cvaC</i>          | ColV (microcin V); on plasmids with <i>iucD/iutA</i> , <i>iroN</i> , <i>sitA</i> , <i>iss</i> and <i>traT</i> | ColV-Cf<br>ColV-Cr               | CACACACAAACGGGAGCTGTT<br>CTTCCCGCAGCATAGTTCCAT   | 9  |
| <i>iss</i>           | Increased serum survival (outer membrane protein)                                                             | is-f<br>is-r                     | CAGCAACCCGAACCACTTGATG<br>AGCATTGCCAGAGCGGCAGAA  | 26 |
| <i>traT</i>          | Serum resistance-associated (outer membrane protein)                                                          | TraT f<br>TraT r                 | GGTGTGGTGCATGAGCACAG<br>CACGGTTCAGCCATCCCTGAG    | 9  |
| <i>ibeA</i>          | Invasion of brain endothelium                                                                                 | ibe10 f<br>ibe10 r               | AGGCAGGTGTGCGCCGCGTAC<br>TGGTGCTCCGGCAAACCATGC   | 9  |
| <i>malX</i><br>(PAI) | Pathogenicity-associated island marker (PAI)                                                                  | MALX-F<br>MALX-R                 | GCATGAGCAGTGCATACATCGC<br>AGGGCTGGGAAGTGGTTTAGCC | 12 |
| <i>usp</i>           | Uropathogenic-specific protein (bacteriocin)                                                                  | usp-f<br>usp-r                   | ACATTCACGGCAAGCCTCAG<br>AGCGAGTTCCTGGTGAAAGC     | 27 |
| <i>ompT</i>          | Outer membrane protein (protease) T                                                                           | ompT-F<br>ompT-R                 | ATCTAGCCGAAGAAGGAGGC<br>CCCGGGTCATAGTGTTTCATC    | 2  |
| <i>betA</i>          | Choline dehydrogenase                                                                                         | betA-F<br>betA-R                 | CGGTTTCGGCGTGGTTAC<br>GTGGGCATGTGCGGATTA         | 8  |
| <i>hha</i>           | Gene regulator in the enterobacteria                                                                          | hha forward/<br>hha reverse      | GTTTACGTCGTTGCAGACAA/<br>TTCCATACTGAGGAAGGGATCT  | 20 |
| <i>hha2</i>          | Gene regulator in the enterobacteria                                                                          | 4516<br>forward/<br>4516 reverse | CTTACCCTTGCGGAGCTGGA/<br>TATTTCCAGACAGAAGCCGGAA  | 20 |
| <i>hha3</i>          | Gene regulator in the enterobacteria                                                                          | 4796<br>forward/<br>4796 reverse | GAGACGCGGGAAAAGTGAAT/<br>CAGGTGACATATTTCCAGACGG  | 20 |

## Supplementary References

1. Kado, C. I. & Liu, S. T. Rapid procedure for detection and isolation of large and small plasmids. *J. Bacteriol.* **145**, 1365–73 (1981).
2. Johnson, J. R. *et al.* Host Characteristics and Bacterial Traits Predict Experimental Virulence for Escherichia coli Bloodstream Isolates From Patients With Urosepsis. *Open forum Infect. Dis.* **2**, ofv083 (2015).
3. Johnson, J. R. *et al.* Isolation and molecular characterization of nalidixic acid-resistant extraintestinal pathogenic Escherichia coli from retail chicken products. *Antimicrob. Agents Chemother.* **47**, 2161–8 (2003).
4. Spurbeck, R. R. *et al.* Escherichia coli isolates that carry vat, fyuA, chuA, and yfcV efficiently colonize the urinary tract. *Infect. Immun.* **80**, 4115–22 (2012).
5. Dallenne, C., Da Costa, A., Decré, D., Favier, C. & Arlet, G. Development of a set of multiplex PCR assays for the detection of genes encoding important beta-lactamases in Enterobacteriaceae. *J. Antimicrob. Chemother.* **65**, 490–5 (2010).
6. Beyrouthy, R. *et al.* IS1R-mediated plasticity of IncL/M plasmids leads to the insertion of bla OXA-48 into the Escherichia coli Chromosome. *Antimicrob. Agents Chemother.* **58**, 3785–90 (2014).
7. Rodríguez, I., Rodicio, M. R., Mendoza, M. C. & Cruz Martín, M. Large conjugative plasmids from clinical strains of Salmonella enterica serovar virchow contain a class 2 integron in addition to class 1 integrons and several non-integron-associated drug resistance determinants. *Antimicrob. Agents Chemother.* **50**, 1603–7 (2006).
8. Wang, Y., Tang, C., Yu, X., Xia, M. & Yue, H. Distribution of serotypes and virulence-associated genes in pathogenic Escherichia coli isolated from ducks. *Avian Pathol.* **39**, 297–302 (2010).
9. Johnson, J. R. & Stell, A. L. Extended virulence genotypes of Escherichia coli strains from patients with urosepsis in relation to phylogeny and host compromise. *J. Infect. Dis.* **181**, 261–72 (2000).
10. Marc, D. & Dho-Moulin, M. Analysis of the fim cluster of an avian O2 strain of Escherichia coli: serogroup-specific sites within fimA and nucleotide sequence of fimI. *J. Med. Microbiol.* **44**, 444–52 (1996).
11. Yamamoto, S. *et al.* Detection of urovirulence factors in Escherichia coli by multiplex polymerase chain reaction. *FEMS Immunol. Med. Microbiol.* **12**, 85–90 (1995).
12. Mora, A. *et al.* Poultry as reservoir for extraintestinal pathogenic Escherichia coli O45:K1:H7-B2-ST95 in humans. *Vet. Microbiol.* **167**, 506–12 (2013).
13. Le Bouguenec, C., Archambaud, M. & Labigne, A. Rapid and specific detection of the pap, afa, and sfa adhesin-encoding operons in uropathogenic Escherichia coli strains by polymerase chain reaction. *J. Clin. Microbiol.* **30**, 1189–93 (1992).

14. Lehti, T. A., Heikkinen, J., Korhonen, T. K. & Westerlund-Wikström, B. The response regulator RcsB activates expression of Mat fimbriae in meningitic *Escherichia coli*. *J. Bacteriol.* **194**, 3475–85 (2012).
15. Spurbeck, R. R. *et al.* *Escherichia coli* Isolates That Carry *vat*, *fyuA*, *chuA*, and *yfcV* Efficiently Colonize the Urinary Tract. *Infect. Immun.* **80**, 4115–4122 (2012).
16. Tóth, I., Héroult, F., Beutin, L. & Oswald, E. Production of cytolethal distending toxins by pathogenic *Escherichia coli* strains isolated from human and animal sources: establishment of the existence of a new *cdt* variant (Type IV). *J. Clin. Microbiol.* **41**, 4285–91 (2003).
17. Johnson, J. R., Gajewski, A., Lesse, A. J. & Russo, T. A. Extraintestinal pathogenic *Escherichia coli* as a cause of invasive nonurinary infections. *J. Clin. Microbiol.* **41**, 5798–802 (2003).
18. Dozois, C. M. *et al.* Relationship between the Tsh autotransporter and pathogenicity of avian *Escherichia coli* and localization and analysis of the Tsh genetic region. *Infect. Immun.* **68**, 4145–54 (2000).
19. Morales, C., Lee, M. D., Hofacre, C. & Maurer, J. J. Detection of a novel virulence gene and a *Salmonella* virulence homologue among *Escherichia coli* isolated from broiler chickens. *Foodborne Pathog. Dis.* **1**, 160–5 (2004).
20. Prieto, A. *et al.* Tracking bacterial virulence: global modulators as indicators. *Sci. Rep.* **6**, 25973 (2016).
21. Vigil, P. D. *et al.* Presence of putative repeat-in-toxin gene *tosA* in *Escherichia coli* predicts successful colonization of the urinary tract. *MBio* **2**, e00066-11 (2011).
22. Schubert, S., Rakin, A., Karch, H., Carniel, E. & Heesemann, J. Prevalence of the “high-pathogenicity island” of *Yersinia* species among *Escherichia coli* strains that are pathogenic to humans. *Infect. Immun.* **66**, 480–5 (1998).
23. Runyen-Janecky, L. J., Reeves, S. A., Gonzales, E. G. & Payne, S. M. Contribution of the *Shigella flexneri* Sit, Iuc, and Feo iron acquisition systems to iron acquisition in vitro and in cultured cells. *Infect. Immun.* **71**, 1919–28 (2003).
24. Johnson, J. R. & O’Bryan, T. T. Detection of the *Escherichia coli* group 2 polysaccharide capsule synthesis Gene *kpsM* by a rapid and specific PCR-based assay. *J. Clin. Microbiol.* **42**, 1773–6 (2004).
25. Moulin-Schouleur, M. *et al.* Common virulence factors and genetic relationships between O18:K1:H7 *Escherichia coli* isolates of human and avian origin. *J. Clin. Microbiol.* **44**, 3484–92 (2006).
26. Rodriguez-Siek, K. E., Giddings, C. W., Doetkott, C., Johnson, T. J. & Nolan, L. K. Characterizing the APEC pathotype. *Vet. Res.* **36**, 241–56 (2005).
27. Bauer, R. J. *et al.* Molecular Epidemiology of 3 Putative Virulence Genes for *Escherichia coli* Urinary Tract Infection—*usp*, *iha*, and *iroN* *E. coli*. *J. Infect. Dis.* **185**, 1521–1524 (2002).
